# **Accumulation of somatic mutations leads to genetic mosaicism in Cannabis**

Kristian Adamek<sup>1</sup>, Davoud Torkamaneh<sup>1</sup>, Andrew Maxwell Phineas Jones<sup>1\*</sup>

<sup>1</sup> Department of Plant Agriculture, University of Guelph, Guelph, N1G 2W1, ON, Canada

\* Correspondence: [amjones@uoguelph.ca](mailto:amjones@uoguelph.ca)

## Abstract

1 Cannabis is typically propagated using stem cuttings taken from mother plants to produce  
2 genetically uniform propagules. However, producers anecdotally report that clonal lines  
3 deteriorate over time and eventually produce clones with less vigour and lower cannabinoid levels  
4 than the original mother plant. While the cause of this deterioration has not been investigated, one  
5 potential contributor is the accumulation of somatic mutations within the plant. To test this, we  
6 used deep sequencing of whole genomes (>50x depth of coverage) to compare the variability  
7 within an individual *Cannabis sativa* cv. “Honey Banana” plant sampled at the bottom, middle  
8 and top. Overall, we called over 6 million sequence variants based on a published reference  
9 genome (SNPs, MNPs, and indels) and found that that the top had the most by a sizable amount.  
10 We compared the variants among the samples and uncovered that nearly 600K (34%) were unique  
11 to the top while the bottom only contained 148K (12%) and middle with 77K (9%) unique variants.  
12 Bioinformatics tools were used to identify high impact mutations in critical cannabinoid/terpene  
13 biosynthesis pathways. While none were identified, some contained more than double the average  
14 level of nucleotide diversity ( $\pi$ ) in or near the gene, including OLS, CBDAS, HMGR2 and  
15 CsTPS9FN. The first two genes code for essential enzymes required for the cannabinoid pathway  
16 while the other two are involved in the terpene pathways, demonstrating that mutations were  
17 accumulating within these pathways and could influence their function. Overall, these data  
18 identified a measurable number of intra-plant genetic diversity that could impact the long-term  
19 genetic fidelity of clonal lines and potentially contribute to the observed decline in vigour and  
20 cannabinoid content.  
21

1 **Keywords:** Cannabis, Whole-genome sequencing, Somatic mutation, Genetic mosaicism

2

### 3 **Introduction**

4 *Cannabis sativa* L. (marijuana, hemp, cannabis; Cannabaceae) is regarded as one of the first crops  
5 humans domesticated and is primary a dioecious diploid annual species ( $2n = 20$ ) cultivated for  
6 fiber, oil, seed and its medicinal and psychoactive properties (Hillig, 2005). The main  
7 pharmaceutical and psychoactive compounds are cannabinoids that accumulate in trichomes  
8 produced primarily on floral tissues of female plants (van Bakel *et al.*, 2011). To date, 177  
9 cannabinoids have been identified and described, with the two most naturally abundant, well-  
10 studied, and sought after being (-)-*trans*- $\Delta^9$ -tetrahydrocannabinol (THC) and cannabidiol (CBD)  
11 (Hanusš and Hod, 2020; Hurgobin *et al.*, 2020). These compounds have many demonstrated  
12 therapeutic properties, including alleviating symptoms in epilepsy (Devinsky *et al.*, 2014) and  
13 multiple sclerosis (van Amerongen *et al.*, 2018) and are being investigated for other ailments such  
14 as Alzheimer's disease (Watt and Karl, 2017). Additionally, cannabis produces hundreds of  
15 different terpenes/terpenoids, which are also known to have therapeutic effects, including  
16 antifungal, antiviral, anticancer, anti-inflammatory, antiparasitic, antioxidant, and antimicrobial  
17 activities, and are thought to interact with cannabinoids to alter their activities (Hanusš and Hod,  
18 2020). Cannabinoids, terpenes and other secondary metabolites are produced in the capitate stalked  
19 glandular trichomes and minor variations in concentrations of each may result in distinct  
20 therapeutic effects (Hurgobin *et al.*, 2020).

21 The polyketide, cannabinoid, and methylerythritol phosphate (MEP) pathways are responsible for  
22 the creation of the cannabinoids (i.e. THCA, CBDA, CBCA, CBGA) and the monoterpene,

1 mevalonate (MEV), sesquiterpene and methylerythritol phosphate (MEP) pathways produce  
2 several different terpenes. The medicinal effects of Cannabis plants depend on the relative  
3 concentration of these compounds and are often classified into three main categories based on the  
4 THC:CBD ratio. Type I plants express a well over 1:1 THC:CBD ratio, Type II plants have  
5 moderate amounts with a near equal ratio, and Type III plants contain a less than 1:1 ratio  
6 (Hurgobin *et al.*, 2020). However, it should be noted that this is an oversimplification of the  
7 chemical diversity found within Cannabis and that each plant has a unique chemical fingerprint  
8 that may impact its biological activity.

9 Clonal propagation is the primary method used when cultivating Type I & II cannabis plants for  
10 medicinal or recreational use to ensure genetic and phenotypic uniformity (McKernan *et al.*, 2020).  
11 To achieve this, mother plants are established from elite seedlings that have been selected largely  
12 based on their specific chemical profile. Mother plants are capable of supplying hundreds or  
13 thousands of cuttings, usually taken from the apical region of the plant. The mother plants are  
14 maintained in an indefinite vegetative state for many years using a constant long day photoperiod  
15 (18:6 hours) and are occasionally replaced using a clonal propagule taken from themselves.

16 Vegetative propagation is used in many other domesticated plants to maintain valuable genotypes  
17 including bananas, potatoes, grapes, hops, and coffee trees (McKey *et al.*, 2010; Carrier *et al.*,  
18 2012). Theoretically, clones produce plants that are genetically identical and phenotypically  
19 similar to the parent stock, however, cannabis producers have observed a decline in the quality of  
20 clones taken from a mother plant, usually resulting in reduced cannabinoid production and plant  
21 vigour (Cannabis growers, personal communication, 2020). While no peer-reviewed study has  
22 investigated this in cannabis, it has been discussed widely in the gray literature (Burnstein, 2019)

1 and this is a well-known phenomenon in other species that demonstrate a decline in plant vigour  
2 during extended periods of vegetative propagation (Muller, 1932, 1964).

3 Muller's Ratchet, a term first proposed by Felsenstein (1974), is a theory developed to explain this  
4 phenomenon and suggests that in the absence of sexual recombination, species accumulate  
5 irreversible somatic mutations (Muller, 1932; Govindaraju *et al.*, 2020). Further, since the majority  
6 of random mutations are deleterious, the long-term effect of their accumulation is a decline in plant  
7 vigour similar to what has been observed in cannabis. While somatic mutations have also  
8 positively impacted agriculture by producing unique clonal varieties of apples, citrus, and wine  
9 grapes derived by propagating genetically diverse bud sports, the phenomenon is problematic for  
10 long term genetic preservation of elite individuals (Cruzan, Streisfeld and Schwoch, 2018).

11 Whether somatic mutations are beneficial or deleterious, it is well-known that they occur and can  
12 lead to genetic diversity even within a single plant.

13 The source of this diversity lies in the nature of plant growth and development, in which  
14 meristematic regions grow and develop independent from one another. As they grow, they each  
15 accumulate a unique set of somatic mutations that leads to genetic diversity within a plant. This  
16 phenomenon has been under investigation since the 1970s where isozyme analysis was initially  
17 used to demonstrate genetic variation within single trees (Marshall and Allard, 1970). More  
18 recently, DNA sequencing verified this and identified that genetic distance increases  
19 systematically throughout a tree such that the mutation load is greatest at the distal end (Diwan *et*  
20 *al.*, 2014; Orr *et al.*, 2020). This phenomenon is known as the Genetic Mosaicism Hypothesis  
21 (GMH) and states that individual plants become genetically diverse due to the accumulation of  
22 spontaneous mutations occurring randomly as independent branches grow (Gill *et al.*, 1995).

23 While this phenomenon is often neglected during preservation of clonal lines, it could have a

1 significant impact on long term genetic fidelity, especially in species with higher than average  
2 mutation rates.

3 In this study, we examined if the GMH applies to cannabis by sequencing the full genome of three  
4 samples taken from different locations within a single mother plant. These data were used to  
5 identify nucleotide variants within the plant using bioinformatics tools and assess the degree of  
6 variation within the plant. We then calculated the unique and shared variants among samples.  
7 Lastly, we investigated the potential impact of the nucleotide variants in critical cannabinoid and  
8 terpene synthesis genes. Overall, this study confirms there was a significant degree of genetic  
9 variability within a single cannabis plant and raises concerns about long term genetic preservation  
10 using clonal propagation.

## 11 **Results**

### 12 **Deep full genome sequencing of bottom, middle and top regions from a mother plant**

13 We performed deep whole-genome sequencing (WGS) on three samples, taken from the stems  
14 located at 59 cm, 151 cm, and 226 cm from the top of the pot of a 2.4 m tall, 1.5-year-old mother  
15 plant (Figure 1A). This mother plant was a clonally propagated seedling selection from *Cannabis*  
16 *sativa* cv. “Honey Banana” (HB) plant (BrantMed Inc., Brantford, ON), which is a high THC type-  
17 I plant. In total, we generated >1 billion 150-bp paired-end reads using an Illumina Novaseq 6000  
18 technology (Table 1). This represents an average 58x depth of coverage across the three samples.  
19 These reads were mapped against the public cannabis reference genome (cs10 v. 2.0; GenBank  
20 Accession No. GCA\_900626175.2) with a mapping success rate of greater than 93% (Table 1),  
21 thus covering >97% of the cs10 v. 2.0 genome sequence (Grassa *et al.*, 2021). Using the Fast-  
22 WGS (Torkamaneh *et al.*, 2018) bioinformatics pipeline, we detected 1.3, 0.9, and 1.7 M

1 nucleotide variants (i.e. single- and multiple nucleotide variants (SNVs and MNVs) and small  
2 insertions/deletions (indels)) in the samples derived from the bottom, middle, and top of the mother  
3 plant, respectively. Originally, 6.4 M nucleotide variants were detected but due to the high level  
4 of heterozygosity discovered, we employed a filter to both the minimum number of reads (minNR)  
5 and the minimum number of reads containing variants (minNV) to greater than 10. Altogether,  
6 over 3.8 M variants compared to the reference genome were identified with a  
7 transition/transversion (Ts/Tv) ratio of 1.9. As detailed in Table 1, the top of the plant had the most  
8 variants, followed by the bottom, while the middle had the fewest, demonstrating intra-plant  
9 genetic diversity. When comparing the locations there was a difference of ~400K variants between  
10 the bottom and middle as well as the bottom and top. However, the difference between the middle  
11 and top was much greater with a total of 850K variants.

1 **Table 1.** Statistics related to the whole-genome sequencing of Cannabis samples.

2

---

| <b>Sample</b> | <b>Nb of reads (M)</b> | <b>Depth of coverage (x)</b> | <b>Mapping rate (%)</b> | <b>SNV</b> | <b>MNV</b> | <b>INS</b> | <b>DEL</b> | <b>Total<sup>a</sup></b> |
|---------------|------------------------|------------------------------|-------------------------|------------|------------|------------|------------|--------------------------|
| Bottom        | 362                    | 62                           | 94.1                    | 966,945    | 104,519    | 95,910     | 98,124     | 1,265,498                |
| Middle        | 314                    | 54                           | 93.8                    | 670,974    | 63,953     | 64,168     | 64,988     | 864,083                  |
| Top           | 336                    | 58                           | 93.9                    | 1,290,497  | 154,789    | 133,460    | 136,061    | 1,714,807                |

---

3 <sup>a</sup>Number of variants compared to the reference genome with minNR>10 and minNV>10.

4

5

6

7

8

9

10

11

12

13

14

15

16



## 1 **Mutational variation detected inside a singular *C. sativa* mother plant**

2 For further analysis, the catalogues of detected variants relative to the cannabis reference genome  
3 (cs10 v. 2.0; Grassa *et al.*, 2021) for each sample (i.e. bottom, middle, and top) were compared to  
4 assess the overlapping and unique variants. As can be seen in Figure 1B, more than 600K variants,  
5 compared to reference genome, were shared among all samples representing 51%, 75%, and 38%  
6 of variants detected in the sample from the bottom, middle, and top section of the mother plant,  
7 respectively. Bottom and top samples shared the greatest number of variants (403K), however top  
8 and middle shared only 72K variants. The lowest overlap was observed between bottom and  
9 middle, 67K. Most interestingly, the top sample contained the most unique variants at 34% (592K)  
10 followed by the bottom with 12% (147K) and the middle with 9% (77K). The most intriguing  
11 aspect of the result is that the top sample contained the most *de novo* (new) mutations. We  
12 document a very high rate of somatic mutations among the bottom, middle and top of a cannabis  
13 mother plant during vegetative growth.

14 According to the  $\pi$  statistic, the nucleotide diversity within three samples from a single plant was  
15  $\pi = 6.0 \times 10^{-4}$ . To explore the genetic similarity between samples using nucleotide variants, we  
16 constructed a phylogenic tree using a genetic distance approach and the neighbour-joining method  
17 with repetition 1000x bootstrap test (Figure 1C). This shows two main branches, an individual  
18 bottom branch as well as a middle and top branch as the second, since they share a node. Within a  
19 single plant, we observed a very quickly declined linkage disequilibrium (LD) (Supplemental  
20 Figure 1). The LD was seen to decay to its half in only a few kb.

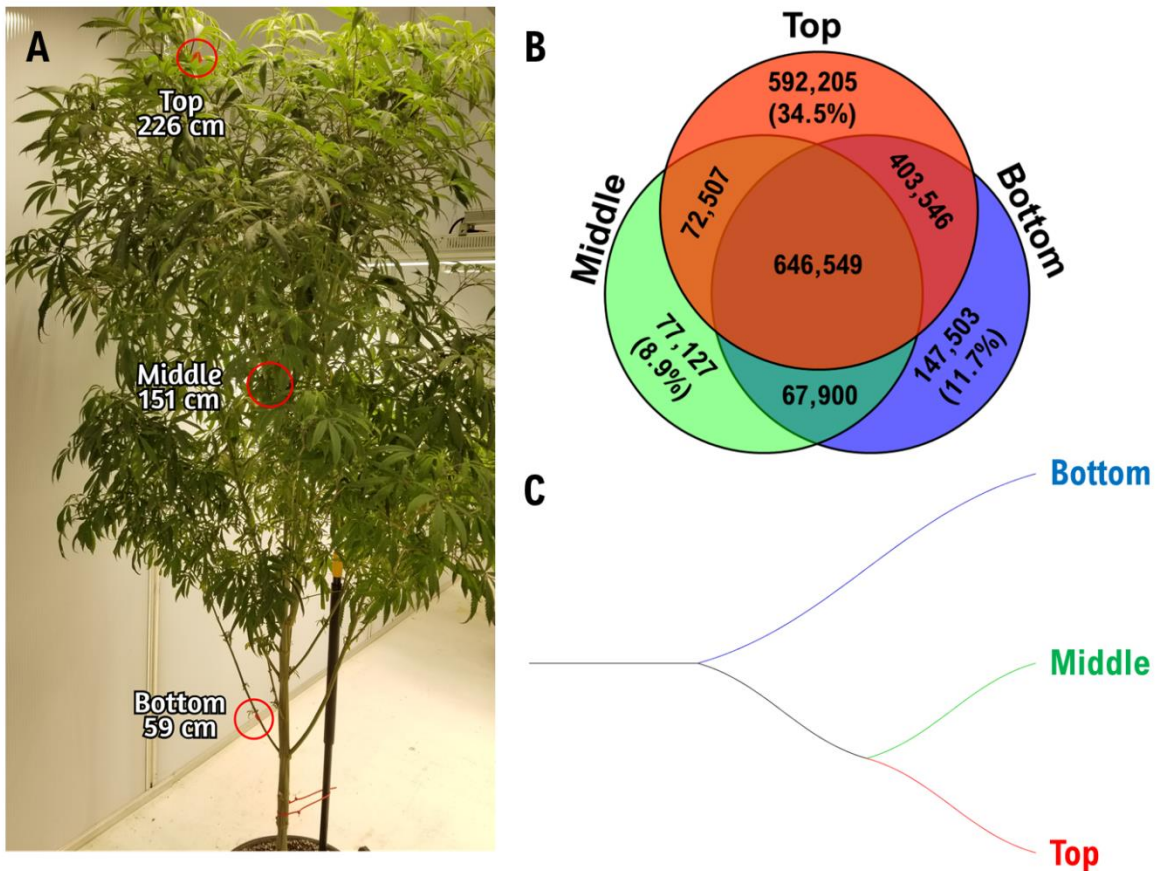

1  
2 **Figure 1.** Whole-genome sequencing of a cannabis mother plant. (A) Honey Banana, a mother  
3 plant (age: ~1.5 years), exhibited incredible growth, vigour and excellent traits which made this  
4 an ideal cultivar for this study. Three stem samples were taken from the top (226cm), middle  
5 (151cm) and bottom (59cm) and had their genomes fully sequenced. (B) A Venn diagram reveals  
6 the overlapping and unique nucleotide variants for the top, middle and bottom. (C) A phylogenetic  
7 tree created using a genetic distance approach and the neighbour-joining method demonstrates that  
8 the top and middle are more similar by sharing a common node while the bottom has a separate  
9 branch.

10

11 Finally, based on a visualization approach using IGV (Robinson *et al.*, 2011), we determined if  
12 the variants were clustered in specific regions of the genome. As can be seen from Supplementary  
13 Figure 2, there were certain areas in the genome that contain fewer mutations and others where  
14 elevated levels of mutations emerged. Specifically, one, five, eight and the X chromosomes had  
15 an apparent increased count while chromosomes two, three, four, six, seven and nine showed to

1 have fewer. Furthermore, an intriguing observation was that chromosomes with more mutations  
2 also had higher levels of mutations in euchromatin regions (i.e. gene rich). Altogether, clusters of  
3 mutations appeared across the genome and as a result could indicate mutational hotspots exist  
4 within the cannabis genome.

### 5 **Functional impact on the genome from mutations are divergent depending on the** 6 **location on the plant**

7 To explore the potential functional impact of the mutations, we classified sequence variants into  
8 five categories based on their localization and identified the putative impact of the mutations. As  
9 can be seen in Figure 2A, more than half (51%) of the variants were in up/downstream regions,  
10 hence in close proximity of genes (5kb before and after gene) and the other 49% of the variants  
11 were located in intergenic regions (35%), genic regions (13%), splice sites (0.4%), and  
12 untranslated regions (UTR; 0.4%). Additionally, the genic category consists of exons, introns, and  
13 transcriptional variants at 2%, 4.5%, and 6.7%, respectively. From a functional standpoint, we  
14 were particularly interested in the subset of mutations predicted to have a large impact. Therefore,  
15 we explored the category of the high impact mutations (i.e. variants which are predicted to have a  
16 disruptive impact on the protein, probably leading to protein truncation, loss of function or  
17 triggering non-sense-mediated decay). Figure 2B presents the unique and shared high impact  
18 mutations from the bottom, middle and top samples. This information follows a similar pattern as  
19 seen for entire variants (Figure 1B) where the percentage of variants are similar. The number of  
20 shared high impact mutations between all samples was 845 which corresponds to 41%, 77%, and  
21 28% of the total high impact mutations for the bottom, middle and top, accordingly. The top sample  
22 had the most unique high impact mutations with 1,234 (40%), next the bottom with 247 (12%) and  
23 lastly the middle with 63 (6%). The most intriguing was middle and top because there was a large

1 difference between the unique variants (1.2K) (Figure 2B). Also, they shared 952 with 107  
2 exclusively together, which represents 31% of top and 87% of middle total high impact mutations.  
3 To provide a more relevant perspective, we mainly focused on the high impact mutations from the  
4 middle and top samples as they are new mutations and ultimately, they might show a different  
5 phenotype compared to the original plant (i.e. bottom). In total, 1,333 high impact mutations were  
6 divided into four categories and represented frameshift (46%), premature stop codon (32%), splice  
7 site (17%), and stop loss (4%) mutations (Figure 2C). These results show that a large number of  
8 high impact mutations (>1K) arise as the cannabis mother plant grows and is maintained for a long  
9 time and as a consequence potentially severely affects the function of important genes. Owing to  
10 the lack of any significant enrichment in terms of gene ontology (GO) annotation, we investigated  
11 the functional impact of these mutations in the important cannabinoid and terpene production  
12 related genes individually using public databases.

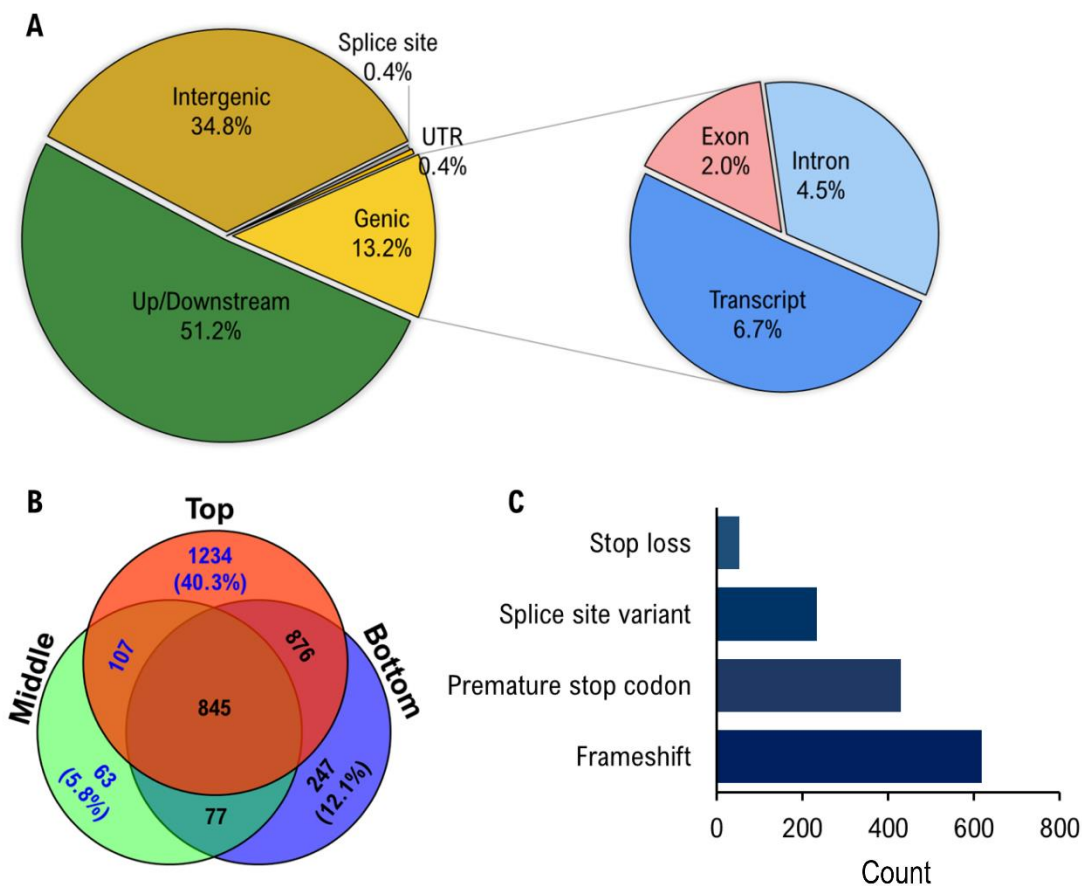

1  
2 **Figure 2.** Analysis of the location and impact of nucleotide variants. (A) A pie graph visualization  
3 that displays the percentages from the five main categories of found variants (intergenic,  
4 up/downstream, genic, UTR, and splice site) while a secondary pie graph reveals the breakdown  
5 of the genic category (transcript, exon and intron). (B) A Venn diagram showing the high impact  
6 variants throughout and between the top, middle and bottom with the blue text highlighting *de*  
7 *novo* variants. (C) High impact mutations were organized into four categories and represented  
8 frameshift (46%), premature stop codon (32%), splice site (17%), and stop loss (4%) mutations.  
9

### 10 **Properties of novel mutations on cannabinoid and terpene pathways genes**

11 To more specifically focus on the potential impact of these mutations on secondary metabolite  
12 production, we studied the functional impact of mutations that occurred in or near the necessary  
13 cannabinoid and terpene pathway genes. We determined which enzymes were required to create

1 essential chemical compounds and which chromosome they can be found on the cs10 v. 2.0  
2 reference genome (Grassa *et al.*, 2021) for both cannabinoid and terpene pathways from public  
3 databases (Table 2). As seen from the Table 2, we calculated and predicted the number and type  
4 of mutations, nucleotide diversity ( $\pi$ ) in 20kb window encompassing these genes and the contrast  
5 of the  $\pi$  in these genic regions compared to the average genome wide. Analysis of the prediction  
6 of the functional impact of the mutations determined that none of these genes contained a high  
7 impact mutation and recorded all observed variants as modifier. The ratio of gene to genome wide  
8  $\pi$  allowed us to provide a sense of potentially conserve or somatic mutation prone genes. The most  
9 notable genes that undergo somatic mutation were ones with ratio values greater than 2.0 which  
10 includes OLS, CBDAS, HMGR2 and CsTPS9FN, with values of 2.08, 4.35, 2.95, and 2.50,  
11 respectively. Of the remaining 40 genes, 32 were under 2.0 and the other eight are missing data  
12 due to no data found on the NCBI's cannabis protein table. Overall, four genes are noteworthy  
13 because the number of variants emerging, and seem to be more prone to somatic mutations than  
14 others, but this will require additional research to determine if this is a common trend.

15  
16  
17  
18  
19  
20  
21  
22  
23  
24

1 **Table 2.** Variants in cannabinoid and terpene pathway genes

| Abbreviation               | Name                                                    | Chromosome | Reference                 | Nb of variants <sup>a</sup> | Gene $\pi^b$ | Related to Avg <sup>c</sup> |
|----------------------------|---------------------------------------------------------|------------|---------------------------|-----------------------------|--------------|-----------------------------|
| <b>Polyketide pathway</b>  |                                                         |            |                           |                             |              |                             |
| HCS/AAE1                   | Hexanoyl-CoA synthetase 1                               | 3          | Stout et al. 2012         | 10                          | 2.86E-04     | 0.47                        |
| OLS                        | Olivetol synthase                                       | 8          | Taura et al. 2009         | 44                          | 1.26E-03     | 2.08                        |
| OAC                        | Olivetolic acid cyclase                                 | 9          | Gagne et al. 2012         | 28                          | 8.14E-04     | 1.35                        |
| <b>Cannabinoid pathway</b> |                                                         |            |                           |                             |              |                             |
| CBGAS                      | Cannabigerolic acid synthase                            | X          | Page and Boubakir 2012    | 31                          | 8.95E-04     | 1.48                        |
| THCAS                      | Inactive tetrahydrocannabinolic acid synthase           | 7          | Sirikantaramas et al.2004 | 2                           | 5.71E-05     | 0.09                        |
| CBDAS                      | Cannabidiolic acid synthase                             | 7          | Taura et al. 2007         | 92                          | 2.63E-03     | 4.35                        |
| CBCAS                      | Cannabichromosomemenic acid synthase                    | 7          | Page and Stout 2015       | 2                           | 5.71E-05     | 0.09                        |
| <b>MEP pathway</b>         |                                                         |            |                           |                             |              |                             |
| DXS1                       | DXP synthase                                            | 9          | Booth et al. 2017         | 19                          | 5.57E-04     | 0.92                        |
| DXS2                       | DXP synthase                                            | 4          | Booth et al. 2017         | 13                          | 3.71E-04     | 0.61                        |
| DXR                        | DXP reductoisomerase                                    | 3          | Booth et al. 2017         | 0                           | 0.00E+00     | 0                           |
| MCT                        | MEP cytidyltransferase                                  | 4          | Booth et al. 2017         | 29                          | 8.29E-04     | 1.37                        |
| CMK                        | CDP-ME kinase                                           | 2          | Booth et al. 2017         | 1                           | 2.86E-05     | 0.05                        |
| MDS                        | MECDP-synthase                                          | 5          | van Bakel et al. 2011     | 16                          | 4.71E-04     | 0.78                        |
| HDS                        | 1-hydroxy-2-methyl-2-(E)-butenyl 4-diphosphate synthase | 2          | Booth et al. 2017         | 1                           | 2.86E-05     | 0.05                        |
| HDR                        | Hydroxymethylbutenyl diphosphate reductase              | X          | Booth et al. 2017         | 11                          | 3.14E-04     | 0.52                        |
| <b>Monoterpene pathway</b> |                                                         |            |                           |                             |              |                             |
| GPPS.lsu                   | Geranyl pyrophosphate synthase large subunit            | 4          | Booth et al. 2017         | 8                           | 2.43E-04     | 0.4                         |
| GPPS.ssu1                  | Geranyl pyrophosphate synthase small subunit 1          | 6          | Booth et al. 2017         | 4                           | 1.29E-04     | 0.21                        |
| GPPS.ssu2                  | Geranyl pyrophosphate synthase small subunit 2          | ND         | Booth et al. 2017         | -                           | -            | -                           |

|                              |                                                     |    |                        |    |          |      |
|------------------------------|-----------------------------------------------------|----|------------------------|----|----------|------|
| CsTPS1SK/CsTPS14CT           | (-)-limonene synthase                               | 5  | Günnewich et al. 2007  | 16 | 4.57E-04 | 0.76 |
| CsTPS2SK                     | (+)- $\alpha$ -pinene synthase                      | ND | Günnewich et al. 2007  | -  | -        | -    |
| CsTPS3FN/CsTPS15CT           | $\beta$ -myrcene synthase                           | 5  | Booth et al. 2017      | 12 | 3.43E-04 | 0.57 |
| CsTPS5FN                     | $\beta$ -myrcene, (-)- $\alpha$ -pinene synthase    | 9  | Booth et al. 2017      | 1  | 2.86E-05 | 0.05 |
| CsTPS6FN                     | (E)- $\beta$ -ocimene synthase                      | 5  | Booth et al. 2017      | 9  | 2.57E-04 | 0.43 |
| CsTPS13PK                    | (Z)- $\beta$ -ocimene synthase                      | ND | Booth et al. 2017      | -  | -        | -    |
| CsTPS30PK                    | $\beta$ -myrcene synthase                           | 5  | Booth et al. 2017      | 9  | 2.57E-04 | 0.43 |
| CsTPS33PK                    | $\alpha$ -terpinene, $\gamma$ -terpinene synthase   | 5  | Booth et al. 2017      | 37 | 1.06E-03 | 1.75 |
| CsTPS37FN                    | Terpinolene synthase                                | ND | Livingston et al. 2019 | -  | -        | -    |
| CsTPS38FN                    | (E)- $\beta$ -ocimene synthase                      | ND | Livingston et al. 2019 | -  | -        | -    |
| <b>MEV pathway</b>           |                                                     |    |                        |    |          |      |
| HMGS                         | Hydroxymethylglutaryl-CoA synthase                  | 5  | Booth et al. 2017      | 16 | 4.57E-04 | 0.76 |
| HMGR1                        | Hydroxy-methylglutaryl-CoA reductase 1              | X  | Booth et al. 2017      | 5  | 1.57E-04 | 0.26 |
| HMGR2                        | Hydroxy-methylglutaryl-CoA reductase 2              | X  | Booth et al. 2017      | 62 | 1.79E-03 | 2.95 |
| MK                           | Mevalonate Kinase                                   | 2  | Booth et al. 2017      | 15 | 4.29E-04 | 0.71 |
| PMK                          | Phosphomevalonate Kinase                            | 5  | Booth et al. 2017      | 35 | 1.00E-03 | 1.65 |
| MPDC                         | Mevalonate diphosphate decarboxylase                | 1  | Booth et al. 2017      | 15 | 4.29E-04 | 0.71 |
| IDI                          | Isopentenyl-diphosphate delta-isomerase             | ND | Booth et al. 2017      | -  | -        | -    |
| <b>Sesquiterpene pathway</b> |                                                     |    |                        |    |          |      |
| FPPS1                        | Farnesyl diphosphate synthase 1                     | 4  | Booth et al. 2017      | 8  | 2.43E-04 | 0.4  |
| FPPS2                        | Farnesyl diphosphate synthase 2                     | 6  | Booth et al. 2017      | 3  | 8.57E-05 | 0.14 |
| CsTPS4FN                     | Alloaromadendrene synthase                          | 6  | Booth et al. 2017      | 8  | 2.29E-04 | 0.38 |
| CsTPS7FN                     | $\delta$ -selinene synthase                         | ND | Booth et al. 2017      | -  | -        | -    |
| CsTPS8FN                     | $\gamma$ -eudesmol, valencene synthase              | 6  | Booth et al. 2017      | 15 | 4.38E-04 | 0.72 |
| CsTPS9FN                     | $\beta$ -caryophyllene, $\alpha$ -humulene synthase | 6  | Booth et al. 2017      | 53 | 1.51E-03 | 2.5  |
| CsTPS16CC                    | Germacrene B synthase                               | ND | Zager et al. 2019      | -  | -        | -    |



|                     |                             |   |                   |    |          |      |
|---------------------|-----------------------------|---|-------------------|----|----------|------|
| CsTPS20CT           | Hedycaryol synthase         | 6 | Zager et al. 2019 | 38 | 1.10E-03 | 1.82 |
| CsTPS18VF/CsTPS19BL | Nerolidol/linalool synthase | 1 | Zager et al. 2019 | 5  | 1.43E-04 | 0.24 |

- 1 <sup>a</sup> Includes 10kb before and after gene
- 2 <sup>b</sup> Window range 21k bp
- 3 <sup>c</sup> Whole genome nucleotide diversity =  $6.0 \times 10^{-4}$
- 4 ND: Not determined in cs10 v 2.0 genome

5  
6  
7  
8  
9  
10  
11  
12  
13  
14  
15  
16

## 1 **Discussion**

### 2 **Genomic diversity within cannabis**

3 Numerous studies have investigated intra-plant somatic mutations in long-lived perennials, but  
4 few have examined this in annuals and this research is the first to look at intra-plant mutations in  
5 cannabis. (Diwan *et al.*, 2014; Plomion *et al.*, 2018; Hanlon, Otto and Aitken, 2019; Orr *et al.*,  
6 2020). Many previous studies used molecular markers to investigate and calculate mutation rates,  
7 which are prone to miss more rare mutations that whole-genome sequencing (WGS) will capture.  
8 Some research on intra-plant genetic variation were unreliable as they used extrapolations from  
9 microsatellites or chlorophyll mutations, however, more recent research has been able uncover a  
10 more complete understanding due to advances and technologies becoming more accessible  
11 (Schoen and Schultz, 2019). For example, two studies using WGS on a long-lived Oak tree  
12 (*Quercus robur*) reported a much lower mutation rate than what was obtained from scaling up  
13 estimates from *Arabidopsis thaliana*. Based on this they hypothesized that perennials may have a  
14 mechanism to reduce the accumulation of mutations that is lacking in short lives annual species  
15 (Schmid-Siegert *et al.*, 2017; Plomion *et al.*, 2018). Likewise in mammals, it has been shown that  
16 mice have more mutations per cell division than humans, which is consistent with the hypothesis  
17 that short lived species have a higher mutation rates (Milholland *et al.*, 2017). Currently, somatic  
18 mutations are believed to be common in plants but the mutation rate, distribution, morphological  
19 effects, age or size influence, and the differences between annuals and perennials remains poorly  
20 understood (Schoen and Schultz, 2019).

21 Naturally, cannabis is an annual species where it lives until its flowers are pollinated and seeds are  
22 produced. This all occurs during a single season that can range from a few months to closer to a

1 year, and then it naturally dies. In contrast, cannabis plants maintained as mothers are artificially  
2 maintained in a perpetual vegetative state and replaced periodically using clonal propagules that  
3 can extend their life span to several years or even decades. Based on Muller's ratchet, a decline  
4 in plant vigour is likely during this period due to the accumulation of deleterious mutations and  
5 the absence of recombination. The extended life-span of mother plants significantly increases this  
6 concern because each *de novo* deleterious variant bears the potential for both multiplicative and  
7 cumulative effects to genome instability, altered gene expression, molecular heterogeneity, tissue  
8 disintegration and vulnerability to stress (Govindaraju, Innan and Veitia, 2020). In other species,  
9 propagules that inherit deleterious mutation from a mother plant exhibited smaller leaves, reduced  
10 nutrient translocation capacity, degraded genetics, less rooting, lower plant vigour, and a decrease  
11 in growth (Wendling, Trueman and Xavier, 2014; Singh *et al.*, 2015; Orr *et al.*, 2020). Therefore,  
12 our results lead us to hypothesize that prolonging the lifespan of Cannabis plants and constantly  
13 pruning clonal cuttings is leading to the observed plant decline.

14 In this study, we called over 2 million nucleotide variants within a single cannabis plant. In  
15 comparison, the long-lived oak study only called 5,330 potential SNVs that had accumulated over  
16 many years (Schmid-Siegert *et al.*, 2017). Interestingly, the Napoleon Oak genome was less than  
17 1% heterozygous while the cannabis genome is known to be highly heterozygous (estimated at  
18 12.5 – 40.5%) and contains substantial amounts of repetitive elements (estimated at 70%)  
19 (Hurgobin *et al.*, 2020). We identified somatic mutations with deep sequencing (>50x depth of  
20 coverage) and used systematic filtering steps to reduce errors that may have occurred from next-  
21 generation sequencing (NGS) and incorrect mapping (Ajay *et al.*, 2011). A recent cannabis study  
22 sequenced 40 cannabis genomes and they reported an average of 12.8 million SNPs+Indels for  
23 dispensary grade cannabis (Type I and Type II plants) which equated to a variant every ~73 bases

1 while our results equated to a variants every ~425 bases (McKernan *et al.*, 2020). Although our  
2 variants were six-fold less than the average found in the other study, partly due to clonal origin of  
3 our samples, they still represent a substantial quantity of variants that contain the ability to interfere  
4 with the stability and quality of the plant.

5 One might assume that calculating the ratio of transition to transversion from three samples derived  
6 from one individual mother plant is less interesting from a statistical point of view, but the  
7 comparison of this ratio with other cannabis research and other plant species was appealing. The  
8 Ts/Tv ratio found in this study (1.88) was similar to a recent study (Soorni *et al.*, 2017) where the  
9 average Ts/Tv ratio for 69 cannabis individuals was 1.65, showing an intriguing level of intra-  
10 plant genomic diversity. As the Ts/Tv ratio is comparable, we can verify that the value is within  
11 an expected range, which reduced the chances of high false positives or bias. Compared to other  
12 plant species, this ratio is similar to oil palm (1.67) and significantly higher than maize (1.02)  
13 (Batley *et al.*, 2003; Pootakham *et al.*, 2015).

#### 14 **Variants across intra-plant genome**

15 We expected to witness a systematically hierarchical nature of mutation accumulation from the  
16 bottom to the top, as was seen by Diwan *et al* (2014) in their research on genome differences within  
17 Yoshino cherry (*Prunus × yedoensis*) and Japanese beech (*Fagus crenata*) trees. In this study, we  
18 witnessed a minor drop in total variants between the bottom and middle compared to the middle  
19 to top. Although we didn't observe a uniform increase, the uppermost sample was the more  
20 genetically distant from the bottom than was the middle, as seen by other previous intra-plant  
21 studies (Schmid-Siebert *et al.*, 2017; Plomion *et al.*, 2018; Hanlon, Otto and Aitken, 2019).  
22 Additionally, the primary analytical focus in this study was the middle and top variants because

1 they represent *de novo* mutations while the bottom section corresponds to the oldest growth tissue  
2 where, in theory, the mutations counts should be the lowest.

3 While many uncertainties remain about somatic mutation in plants, our results demonstrating  
4 significant genetic variation may be explained by a few possibilities 1) environmental factors 2)  
5 long-term pruning from the top 3) difference between perennials and annuals 4) small sample size.  
6 Environmental factors have been well studied and are known to impact mutation rates, especially  
7 during shock or stress (Gill *et al.*, 1995). Thus, any changes to the environment during the growth  
8 and maintenance of the mother plant, such as light or temperature stress, may have altered the  
9 mutation rates and contributed to their accumulation over time. Next, due to the nature of cannabis  
10 mother plants, they are consistently apically pruned and clonal propagules are taken for  
11 propagation. This practice has a direct impact on the balance between auxin and cytokinin levels,  
12 promotes rapid growth from originally inhibited axillary bud sites, and as a result could impact the  
13 rate of mutations within the plant (Prusinkiewicz *et al.*, 2009; Schaller, Bishopp and Kieber, 2015).  
14 Recently, next generation sequencing (NGS) studies identified major differences in the rate of  
15 mutations between perennials and annuals species, with perennials having a significantly lower  
16 rate than expected, suggesting they may possess a mechanism to suppress the rate (Schoen and  
17 Schultz, 2019). These findings are consistent with our results that found a relatively high number  
18 of mutations and lead us to believe that annuals contain a more severe and sporadic mutation rate  
19 such that prolonging their normal lifespan may lead to a substantial mutation load with potentially  
20 deleterious effects. Lastly, due to the expensive costs of full genome sequencing and intention to  
21 simply identify intra-plant variations, only three positions (i.e. bottom, middle, and top) were  
22 sequenced with the ability to call ultra-rare mutations. As such, it is unknown if the degree of  
23 diversity observed in this study is representative of the species. Further work is needed using

1 larger sample sizes across multiple genotypes in different environments to gain a better  
2 understanding of this phenomenon.

### 3 **Impact on cannabinoid and terpene synthase**

4 We investigated the impact that these mutations may have had on both the cannabinoid and terpene  
5 pathways because of their medical and product quality importance (Hanuš and Hod, 2020; Singh,  
6 Bilichak and Kovalchuk, 2020). First, we examined mutations that were categorized as high impact  
7 from analysis using SnpEff (Cingolani *et al.*, 2012). These mutations are known to have a large  
8 impact on protein production, protein truncation, loss of function or trigger nonsense mediated  
9 decay (Cingolani *et al.*, 2012). Although we didn't identify any high impact mutations in the  
10 cannabinoid and terpene synthase genes, the analysis revealed a similar arrangement of the  
11 distribution of mutations from the total number of variants. Interestingly, the top sample contained  
12 an even larger total percentage by ~6% while the middle had 3% less and the bottom had a less  
13 than 1% difference. This further supported of the notion that apical regions are more genetically  
14 distant than the basal regions.

15 Furthermore, we examined mutations in these pathway genes that fell under the category of  
16 *moderate*, *low*, or *modifier* which relates to non-disruptive changes to protein effectiveness, mostly  
17 harmless or unlikely to change protein performance, and non-coding variants where predictions  
18 are difficult or there is no evidence of impact, respectively. Our analysis revealed that all  
19 discovered variants fell under the modifier category and encouraged the assessment of nucleotide  
20 diversity ( $\pi$ ) with a 20kb scope of critical genes for both pathways. Most of the 44 genes  
21 investigated had a similar or lower value than the average nucleotide diversity ( $\pi$ ), however, four  
22 major genes had values over double. Two of these are a part of terpene production (HMGR2 and  
23 CsTPS9FN) and the other two are involved in the cannabinoid pathway (OLS and CBDAS).

1 HMGR2 role is to convert acetyl-CoA into mevalonic acid which undergoes a few more steps to  
2 produce the synthesis of both  $\gamma$ -eudesmol or  $\beta$ -caryophyllene terpenes. CsTPS9FN is the last  
3 enzyme necessary to produce the  $\beta$ -caryophyllene terpene. OLS and CBDAS were particularly  
4 intriguing because OLS is an essential enzyme for the whole cannabinoid pathway as it converts  
5 hexanoyl-CoA into olivetolic acid which then converts into CBGA, a precursor to many well-  
6 known cannabinoids (i.e. THCA, CBDA, CBCA). CBDAS is the last enzyme required to convert  
7 CBGA into CBDA and this is especially important as its the main cannabinoid used to treat various  
8 health concerns (Maroon and Bost, 2018). Both critical enzymes revealed a more than double  
9 nucleotide diversity ( $\pi$ ) above average and as a result could indicate initial signs of decay in the  
10 cannabinoid pathway.

11 Mother plants are usually selected through large scale, costly, screening programs, and marketed  
12 as strains with unique properties. The alteration of genes over time represents a significant  
13 challenge in long-term batch to batch consistency. Also, cannabis used for medicinal purposes  
14 must ensure a consistent product that provides the appropriate properties and quality that are  
15 necessary for treatments. Thus, a greater insight into somatic mutations may enable new or  
16 superior procedures to assist the preservation of elite cultivars in clonally propagated plants.  
17 Overall, our research highlights an important phenomenon related to maintaining elite genetics  
18 and could provide an underlying mechanism for the decay of cannabinoids and plant vigour that  
19 has been anecdotally observed (Cannabis growers, personal communication, 2020).

20

21

22

## 1 **Conclusion**

2 The findings in this study demonstrate that the genetic diversity exists with a single cannabis plant  
3 and the genetic mosaicism hypothesis applies to *C. sativa*. This study is the first to investigate the  
4 existence of this phenomenon in cannabis plants and the potential consequences from  
5 accumulating somatic mutations in an artificially prolonged annual species. As cannabis normally  
6 lives for ~3-6 months, this process likely enables an unknown, but manageable, amount of somatic  
7 mutations to accumulate. Currently, somatic mutations in plants have many uncertainties  
8 remaining, but due to modern genetic technologies and more affordable whole-genome  
9 sequencing, there has been more contributions with higher degrees of accuracy and precision on  
10 this topic. From a practical standpoint, this significantly benefits the cannabis industry as  
11 understanding this phenomenon will help establish best practices for maintaining mother plants to  
12 minimize, slow or prevent the accumulation of mutations. Based on these data, we advocate  
13 replacing mother plants using cuttings from the basal portion of the plant and discourage  
14 excessively extending the life of a mother plant. Additionally, important genetics should be  
15 preserved using cryopreservation techniques where the original genetic profile can be maintained  
16 and accessed indefinitely (Uchendu *et al.*, 2019). The research here provides a concrete basis for  
17 cannabis mutation research. However, the current study lacked different cultivars, generational  
18 data, mutation rates and multiple biological replicates. Thus, future research will be necessary to  
19 enhance and solidify our understanding of somatic mutations and the mutagenic potential that  
20 exists within a cannabis mother plant.

21

22



## 1 **Materials & Methods**

### 2 **Plant material**

3 A high-THCA mother plant of *Cannabis sativa* cv. “Honey Banana” (15-20% THC; <1% CBD),  
4 was grown indoors at BrantMed Inc. in Ontario, Canada. The plant was grown in nutrient rich soil  
5 with regular feeding of a full nutrient solution developed for vegetative growth adjusted to ~6.5  
6 pH. The proprietary nutrient solution was relatively high in nitrogen, with moderate levels of  
7 phosphorous, potassium (NPK) and micronutrients, administered every 3-5 days as needed. The  
8 plant was grown from seed and transplanted to larger pots as needed, until reaching the 76L (20gal)  
9 pot where it remained until this study was conducted. The environmental conditions were  
10 maintained at 20-25°C and 55-65% relative humidity using BrantMed Inc LED lighting (Grow  
11 Light E1-300W) under long day photoperiods at a 18:6 hour light:dark cycle to maintain the  
12 mother plant in an indefinitely vegetative state. These broad “white” spectrum lights (4.2% red  
13 650-670 nm) with 300-watts provided a photosynthesis photon flux of >440  $\mu\text{mol/s}$  and came with  
14 a PAR photon efficacy of 2.2  $\mu\text{mol/J}$ . Samples were removed when the plant had reached an age  
15 of approximately 1.5 years. We isolated ~2.5cm of fresh stem tissue from three location at 59cm,  
16 151cm, and 226cm which represented the bottom, middle and top samples, respectively (Figure  
17 1A). The samples were frozen and stored in a freezer until DNA extraction.

### 18 **DNA extraction and whole genome resequencing**

19 Frozen stem tissues were ground using a Qiagen TissueLyser. DNA was extracted from  
20 approximately 100 mg of ground tissue using the Qiagen Plant DNeasy Mini Kit according to the  
21 manufacturer’s protocol. DNA was quantified on a NanoDrop spectrophotometer and on a Qubit  
22 fluorometer. Illumina Paired-End libraries were constructed for three DNA samples using the

1 Illumina Tru-seq DNA Library Prep Kit (Illumina, San Diego CA, USA) following the  
2 manufacturer's instructions. The quality of DNA library was verified on an Agilent Bioanalyzer  
3 with a High Sensitivity DNA chip. The sequencing was performed on an Illumina NovaSeq 6000  
4 platform at the McGill University-Génomique Québec Innovation Center in Montreal, QC, Canada  
5 generating >1 billion 150-bp paired-end reads to provide >50x depth of coverage by sequencing  
6 reads against the mapped the public domain *C. sativa* reference genome (cs10 v. 2.0; Grassa *et al.*,  
7 2021)

### 8 **Bioinformatic data analysis**

9 Illumina paired-end reads were processed using Fast-WGS bioinformatics pipeline (Torkamaneh  
10 *et al.*, 2018). In summary, the reads were mapped against cannabis reference genome (cs10 v. 2.0;  
11 GenBank Accession No. GCA\_900626175.2; Grassa *et al.*, 2021) using BWA-MEM (Li, 2013).  
12 The nucleotide variants were called using Platypus (Rimmer *et al.*, 2014). In general, we removed  
13 variants if: 1) they had more than two alleles, 2) an allele was not supported by reads on both  
14 strands, 3) the overall quality (QUAL) score was <32, 4) the mapping quality (MQ) score was <20,  
15 5) read depth (minNR) was <10 and 6) the number of reads supporting variant (minNV) was <10.  
16 Functional annotation of nucleotide variation was performed by SnpEFF and SnpSift (Cingolani  
17 *et al.*, 2012) using a customized reference built using cannabis reference genome annotation file  
18 downloaded from NCBI. To obtain the description of genes with large impact, we used the NCBI's  
19 protein table for cannabis sativa database. The gene ontology (GO) analysis was done using the  
20 singular enrichment analysis (SEA) method implemented in agri-GO (Du *et al.*, 2010).

21

22

1           **Diversity, LD and clustering analysis**

2   Nucleotide diversity ( $\pi$ ) was calculated using VCFtools (Danecek *et al.*, 2011), with a window of  
3   20K bp on the full dataset. An average  $\pi$  across all windowed calculations was used to obtain a  
4   genome-wide average  $\pi$ . A neighbor-joining phylogenetic tree was constructed using full dataset  
5   in Tassel 5.0 (Bradbury *et al.*, 2007). The linkage disequilibrium (LD) decay was determined using  
6   PopLDdecay version 3.40 Beta (Zhang *et al.*, 2019). IGV 2.8 (Robinson *et al.*, 2011) was utilized  
7   to display the distribution of variants within the three samples which was produced with the  
8   indexed version of the VCF file.

9

10           **Acknowledgments**

11   This work was conducted as part of a collaborative research project funded by Brantmed Inc. and  
12   NSERC Alliance [#ALLRP555969 -20 to A.M.P.J and D.T.]. The authors wish to thank  
13   BrantMed Inc. for supporting this project.

14           **Author contributions**

15   DT, AMPJ, and KA conceived the project. DT carried out the WGS and variant calling. KA  
16   performed bioinformatics analysis. KA, DT, and AMPJ contributed to writing the manuscript.

17           **Competing interests**

18   The authors declare that they have no competing interests.

19

20

21

## 1 **References**

- 2 Ajay, S. S. *et al.* (2011) ‘Accurate and comprehensive sequencing of personal genomes’,  
3 *Genome Research*, 21(9), pp. 1498–1505. doi: 10.1101/gr.123638.111.
- 4 van Amerongen, G. *et al.* (2018) ‘Effects on Spasticity and Neuropathic Pain of an Oral  
5 Formulation of  $\Delta^9$ -tetrahydrocannabinol in Patients With Progressive Multiple Sclerosis’,  
6 *Clinical Therapeutics*, 40(9), pp. 1467–1482. doi: 10.1016/j.clinthera.2017.01.016.
- 7 van Bakel, H. *et al.* (2011) ‘The draft genome and transcriptome of *Cannabis sativa*’, p. 18.
- 8 Batley, J. *et al.* (2003) ‘Mining for single nucleotide polymorphisms and insertions/deletions in  
9 maize expressed sequence tag data1’, *Plant Physiology*, 132(1), pp. 84–91.
- 10 Booth, J. K., Page, J. E. and Bohlmann, J. (2017) ‘Terpene synthases from *Cannabis sativa*’,  
11 *PLoS ONE*, 12(3), pp. e0173911–e0173911. doi: 10.1371/journal.pone.0173911.
- 12 Bradbury, P. J. *et al.* (2007) ‘TASSEL: software for association mapping of complex traits in  
13 diverse samples’, *Bioinformatics*, 23(19), pp. 2633–2635. doi: 10.1093/bioinformatics/btm308.
- 14 Burnstein, J. (2019) ‘What is Genetic Drift and How Does it Apply to Cloning and Micro-  
15 propagation?’, *Cannabis & Tech Today*, 30 September. Available at:  
16 <https://cannatechtoday.com/genetic-drift/> (Accessed: 16 June 2020).
- 17 Carrier, G. *et al.* (2012) ‘Transposable Elements Are a Major Cause of Somatic Polymorphism in  
18 *Vitis vinifera* L.’, *PLoS ONE*. Edited by C. Schönbach, 7(3), p. e32973. doi:  
19 10.1371/journal.pone.0032973.
- 20 Cingolani, P. *et al.* (2012) ‘A program for annotating and predicting the effects of single  
21 nucleotide polymorphisms, SnpEff: SNPs in the genome of *Drosophila melanogaster* strain w  
22 <sup>1118</sup>; iso-2; iso-3’, *Fly*, 6(2), pp. 80–92. doi: 10.4161/fly.19695.
- 23 Cruzan, M. B., Streisfeld, M. A. and Schwoch, J. A. (2018) *Fitness Effects of Somatic Mutations*  
24 *Accumulating during Vegetative Growth*. preprint. *Evolutionary Biology*. doi: 10.1101/392175.
- 25 Danecek, P. *et al.* (2011) ‘The variant call format and VCFtools’, *Bioinformatics*, 27(15), pp.  
26 2156–2158. doi: 10.1093/bioinformatics/btr330.
- 27 Devinsky, O. *et al.* (2014) ‘Cannabidiol: Pharmacology and potential therapeutic role in epilepsy  
28 and other neuropsychiatric disorders’, *Epilepsia*, 55(6), pp. 791–802. doi:  
29 <https://doi.org/10.1111/epi.12631>.
- 30 Du, Z. *et al.* (2010) ‘agriGO: a GO analysis toolkit for the agricultural community’, *Nucleic*  
31 *Acids Research*, 38(suppl\_2), pp. W64–W70. doi: 10.1093/nar/gkq310.
- 32 Felsenstein, J. (1974) ‘The evolutionary advantage of recombination’, *Genetics*, 78(2), pp. 737–  
33 756. doi: 10.1093/genetics/78.2.737.

- 1 Gagne, S. J. *et al.* (2012) ‘Identification of olivetolic acid cyclase from *Cannabis sativa* reveals a  
2 unique catalytic route to plant polyketides’, *Proceedings of the National Academy of Sciences*,  
3 109(31), pp. 12811–12816. doi: 10.1073/pnas.1200330109.
- 4 Gill, D. E. *et al.* (1995) ‘Genetic Mosaicism in Plants and Clonal Animals’, p. 23.
- 5 Govindaraju, D. R., Innan, H. and Veitia, R. A. (2020) ‘The Muller’s Ratchet and Aging’,  
6 *Trends in Genetics*, 36(6), pp. 395–402. doi: 10.1016/j.tig.2020.02.004.
- 7 Grassa, C. J. *et al.* (2021) ‘A new *Cannabis* genome assembly associates elevated cannabidiol  
8 (CBD) with hemp introgressed into marijuana’, *New Phytologist*. doi:  
9 <https://doi.org/10.1111/nph.17243>.
- 10 Günnewich, N. *et al.* (2007) ‘Functional Expression and Characterization of Trichome-Specific  
11 (-)-Limonene Synthase and (+)- $\alpha$ -Pinene Synthase from *Cannabis sativa*’, *Natural Product*  
12 *Communications*, 2(3), p. 1934578X0700200301. doi: 10.1177/1934578X0700200301.
- 13 Hanlon, V.C.T, Otto, S. P. and Aitken, S. N. (2019) ‘Somatic mutations substantially increase  
14 the per-generation mutation rate in the conifer *Picea sitchensis*’, *Evolution Letters*, 3, pp. 348–  
15 358. doi: 10.1002/evl3.121a.
- 16 Hanlon, Vincent C. T., Otto, S. P. and Aitken, S. N. (2019) ‘Somatic mutations substantially  
17 increase the per-generation mutation rate in the conifer *Picea sitchensis*’, *Evolution Letters*, 3(4),  
18 pp. 348–358. doi: <https://doi.org/10.1002/evl3.121>.
- 19 Hanuš, L. O. and Hod, Y. (2020) ‘Terpenes/Terpenoids in Cannabis: Are They Important?’,  
20 *Medical Cannabis and Cannabinoids*, 3(1), pp. 25–60. doi: 10.1159/000509733.
- 21 Hillig, K. W. (2005) ‘Genetic evidence for speciation in *Cannabis* (Cannabaceae)’, *Genetic*  
22 *Resources and Crop Evolution*, 52(2), pp. 161–180. doi: 10.1007/s10722-003-4452-y.
- 23 Hurgobin, B. *et al.* (2020) ‘Recent advances in *Cannabis sativa* genomics research’, *New*  
24 *Phytologist*, p. nph.17140. doi: 10.1111/nph.17140.
- 25 Li, H. (2013) ‘Aligning sequence reads, clone sequences and assembly contigs with BWA-  
26 MEM’, 00, pp. 1–3.
- 27 Livingston, S. J. *et al.* (2020) ‘*Cannabis* glandular trichomes alter morphology and metabolite  
28 content during flower maturation’, *The Plant Journal*, 101(1), pp. 37–56. doi:  
29 <https://doi.org/10.1111/tpj.14516>.
- 30 Maroon, J. and Bost, J. (2018) ‘Review of the neurological benefits of phytocannabinoids’,  
31 *Surgical Neurology International*, 9. doi: 10.4103/sni.sni\_45\_18.
- 32 Marshall, D. R. and Allard, R. W. (1970) ‘Isozyme polymorphisms in natural populations of  
33 *Avena fatua* and *A. barbata*’, *Heredity*, 25(3), pp. 373–382. doi: 10.1038/hdy.1970.38.

- 1 McKernan, K. J. *et al.* (2020) ‘Sequence and annotation of 42 cannabis genomes reveals  
2 extensive copy number variation in cannabinoid synthesis and pathogen resistance genes’,  
3 *bioRxiv*, p. 2020.01.03.894428. doi: 10.1101/2020.01.03.894428.
- 4 McKey, D. *et al.* (2010) ‘The evolutionary ecology of clonally propagated domesticated plants:  
5 Tansley review’, *New Phytologist*, 186(2), pp. 318–332. doi: 10.1111/j.1469-8137.2010.03210.x.
- 6 Milholland, B. *et al.* (2017) ‘Differences between germline and somatic mutation rates in  
7 humans and mice’, *Nature Communications*, 8(1), p. 15183. doi: 10.1038/ncomms15183.
- 8 Muller, H. J. (1932) ‘Some Genetic Aspects of Sex’, *The American Naturalist*, 66(703), pp. 118–  
9 138. doi: 10.1086/280418.
- 10 Muller, H. J. (1964) ‘The relation of recombination to mutational advance’, *Mutation*  
11 *Research/Fundamental and Molecular Mechanisms of Mutagenesis*, 1(1), pp. 2–9. doi:  
12 10.1016/0027-5107(64)90047-8.
- 13 Orr, A. J. *et al.* (2020) ‘A phylogenomic approach reveals a low somatic mutation rate in a long-  
14 lived plant’, *Proceedings of the Royal Society B: Biological Sciences*, 287(1922), p. 20192364.  
15 doi: 10.1098/rspb.2019.2364.
- 16 Page, J. E. and Stout, J. M. (2019) ‘Applicant: NATIONAL RESEARCH COUNCIL’,  
17 *US10364416B2*, p. 32.
- 18 Plomion, C. *et al.* (2018a) ‘Oak genome reveals facets of long lifespan’, *Nature Plants*, 4(7), pp.  
19 440–452. doi: 10.1038/s41477-018-0172-3.
- 20 Plomion, C. *et al.* (2018b) ‘Oak genome reveals facets of long lifespan’, *Nature Plants*, 4(7), pp.  
21 440–452. doi: 10.1038/s41477-018-0172-3.
- 22 Pootakham, W. *et al.* (2015) ‘Genome-wide SNP discovery and identification of QTL associated  
23 with agronomic traits in oil palm using genotyping-by-sequencing (GBS)’, *Genomics*, 105(5),  
24 pp. 288–295. doi: 10.1016/j.ygeno.2015.02.002.
- 25 Prusinkiewicz, P. *et al.* (2009) ‘Control of bud activation by an auxin transport switch’,  
26 *Proceedings of the National Academy of Sciences*, 106(41), pp. 17431–17436. doi:  
27 10.1073/pnas.0906696106.
- 28 Rimmer, A. *et al.* (2014) ‘Integrating mapping-, assembly- and haplotype-based approaches for  
29 calling variants in clinical sequencing applications’, *Nature Genetics*, 46(8), pp. 912–918. doi:  
30 10.1038/ng.3036.
- 31 Robinson, J. T. *et al.* (2011) ‘Integrative genomics viewer’, *Nature Biotechnology*, 29(1), pp.  
32 24–26. doi: 10.1038/nbt.1754.
- 33 Schaller, G. E., Bishopp, A. and Kieber, J. J. (2015) ‘The Yin-Yang of Hormones: Cytokinin and  
34 Auxin Interactions in Plant Development’, *The Plant Cell*, 27(1), pp. 44–63. doi:  
35 10.1105/tpc.114.133595.

- 1 Schmid-Siegert, E. *et al.* (2017) ‘Low number of fixed somatic mutations in a long-lived oak  
2 tree’, *Nature Plants*, 3(12), pp. 926–929. doi: 10.1038/s41477-017-0066-9.
- 3 Schoen, D. J. and Schultz, S. T. (2019) ‘Somatic Mutation and Evolution in Plants’, *Annual*  
4 *Review of Ecology, Evolution, and Systematics*, 50(1), pp. 49–73. doi: 10.1146/annurev-ecolsys-  
5 110218-024955.
- 6 Singh, A., Bilichak, A. and Kovalchuk, I. (2020) ‘The genetics of Cannabis – genomic variations  
7 of key synthases and their effect on cannabinoids content’, *Genome*, p. gen-2020-0087. doi:  
8 10.1139/gen-2020-0087.
- 9 Singh, A. K. *et al.* (2015) ‘Parental Age Affects Somatic Mutation Rates in the Progeny of  
10 Flowering Plants’, *Plant Physiology*, 168(1), pp. 247–257. doi: 10.1104/pp.15.00291.
- 11 Sirikantaramas, S. *et al.* (2004) ‘The Gene Controlling Marijuana Psychoactivity: Molecular  
12 Cloning and Heterologous Expression of  $\Delta^1$ -Tetrahydrocannabinolic Acid Synthase from  
13 Cannabis Sativa L.’, *Journal of Biological Chemistry*, 279(38), pp. 39767–39774. doi:  
14 10.1074/jbc.M403693200.
- 15 Soorni, A. *et al.* (2017) ‘Assessment of Genetic Diversity and Population Structure in Iranian  
16 Cannabis Germplasm’, *Scientific Reports*, 7(1), p. 15668. doi: 10.1038/s41598-017-15816-5.
- 17 Stout, J. M. *et al.* (2012) ‘The hexanoyl-CoA precursor for cannabinoid biosynthesis is formed  
18 by an acyl-activating enzyme in Cannabis sativa trichomes’, *The Plant Journal*, 71(3), pp. 353–  
19 365. doi: <https://doi.org/10.1111/j.1365-313X.2012.04949.x>.
- 20 Taura, F. *et al.* (2007) ‘Cannabidiolic-acid synthase, the chemotype-determining enzyme in the  
21 fiber-type Cannabis sativa’, *FEBS Letters*, 581(16), pp. 2929–2934. doi:  
22 <https://doi.org/10.1016/j.febslet.2007.05.043>.
- 23 Taura, F. *et al.* (2009) ‘Characterization of olivetol synthase, a polyketide synthase putatively  
24 involved in cannabinoid biosynthetic pathway’, *FEBS Letters*, 583(12), pp. 2061–2066. doi:  
25 <https://doi.org/10.1016/j.febslet.2009.05.024>.
- 26 Torkamaneh, D. *et al.* (2018) ‘Comprehensive description of genomewide nucleotide and  
27 structural variation in short-season soya bean’, *Plant Biotechnology Journal*, 16(3), pp. 749–759.  
28 doi: 10.1111/pbi.12825.
- 29 Uchendu, E. *et al.* (2019) ‘Cryopreservation of Shoot Tips of Elite Cultivars of Cannabis sativa  
30 L. by Droplet Vitrification’, *Medical Cannabis and Cannabinoids*, 2(1), pp. 29–34. doi:  
31 10.1159/000496869.
- 32 Watt, G. and Karl, T. (2017) ‘In vivo Evidence for Therapeutic Properties of Cannabidiol (CBD)  
33 for Alzheimer’s Disease’, *Frontiers in Pharmacology*, 8. doi: 10.3389/fphar.2017.00020.
- 34 Wendling, I., Trueman, S. J. and Xavier, A. (2014) ‘Maturation and related aspects in clonal  
35 forestry—part II: reinvigoration, rejuvenation and juvenility maintenance’, *New Forests*, 45(4),  
36 pp. 473–486. doi: 10.1007/s11056-014-9415-y.

1 Zager, J. J. *et al.* (2019) ‘Gene Networks Underlying Cannabinoid and Terpenoid Accumulation  
2 in Cannabis’, *Plant Physiology*, 180(4), pp. 1877–1897. doi: 10.1104/pp.18.01506.

3 Zhang, C. *et al.* (2019) ‘PopLDdecay: a fast and effective tool for linkage disequilibrium decay  
4 analysis based on variant call format files’, *Bioinformatics (Oxford, England)*, 35(10), pp. 1786–  
5 1788. doi: 10.1093/bioinformatics/bty875.

6

7

8

9

10

11

12

13

14

15

16

17

18

19

20

21

22

23

24

25

26
